# Supplementary material for: Macrophages mediate cardioprotective cellular postconditioning in acute myocardial infarction
Source: JCI journal article supplement (doi:10.1172/jci81321), 2015-07-27
Supplement: sd1 [file 1]

Supplemental Figure 1.

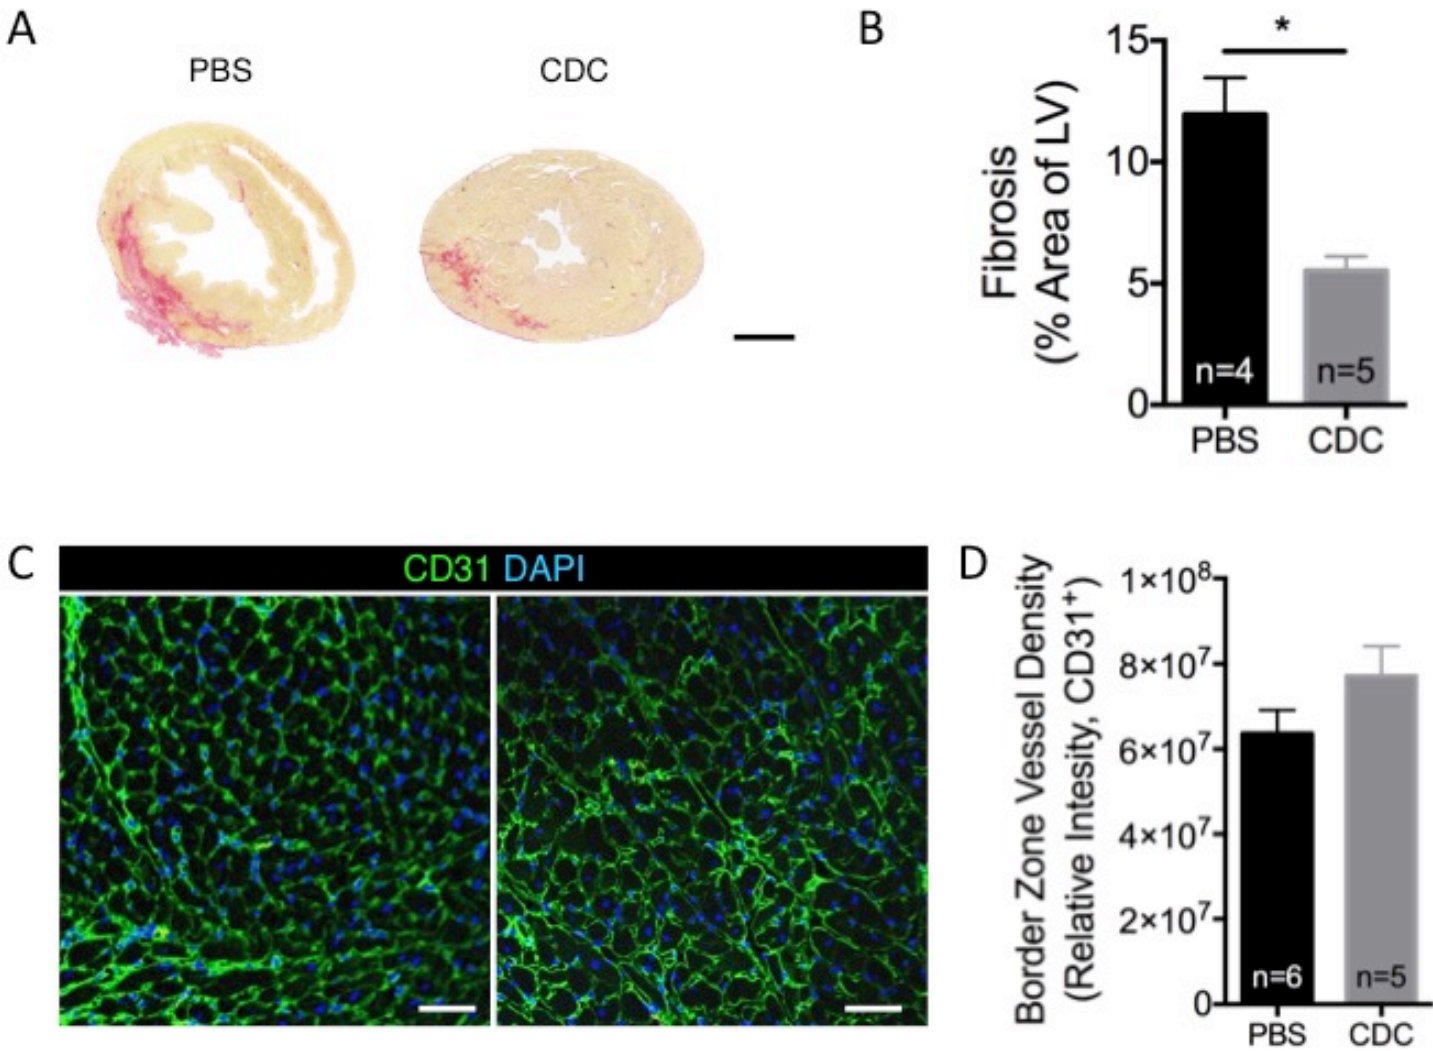

Supplemental Figure 2.

A

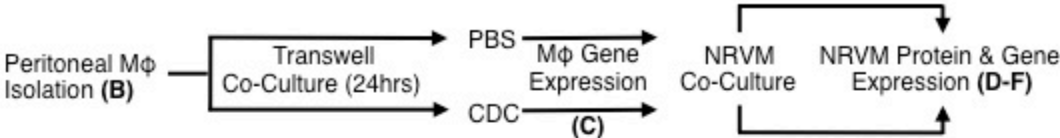

B

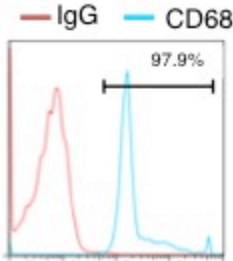

C

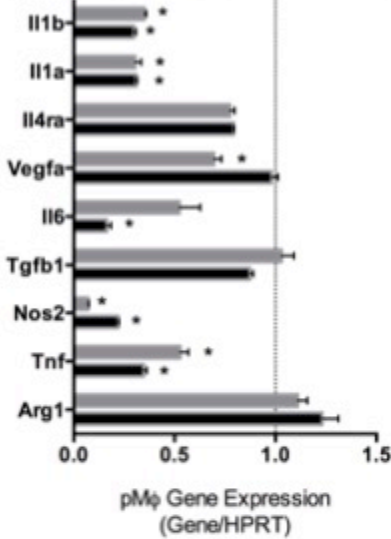

D

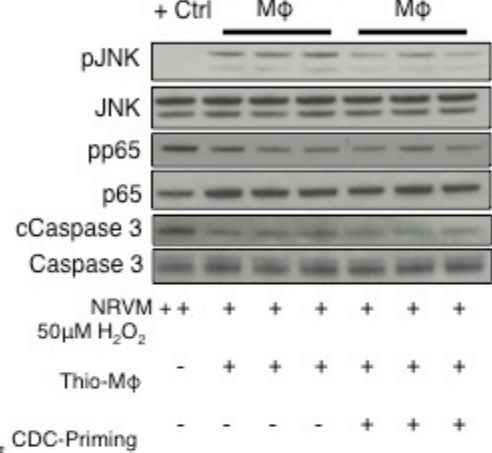

E

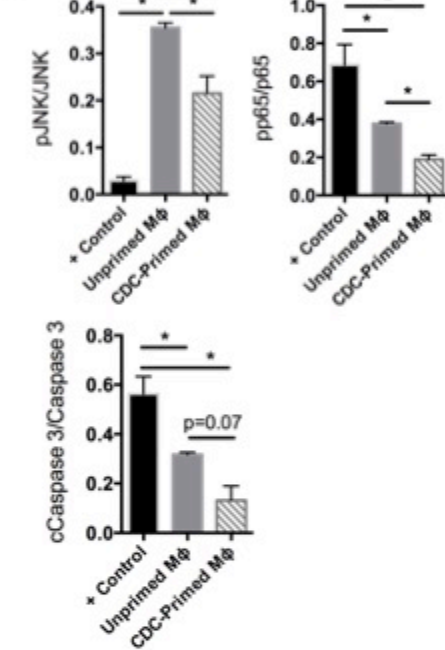

F

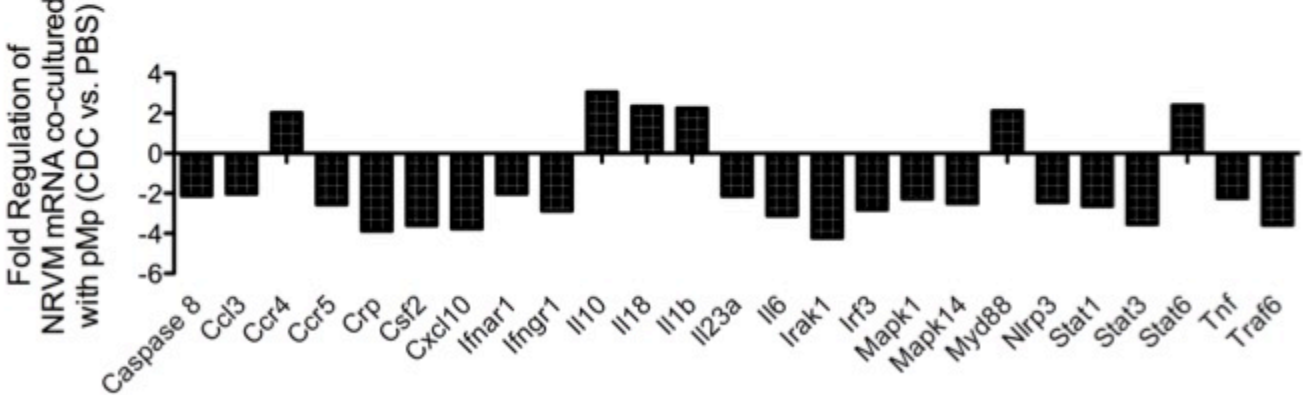

Supplemental Figure 3.

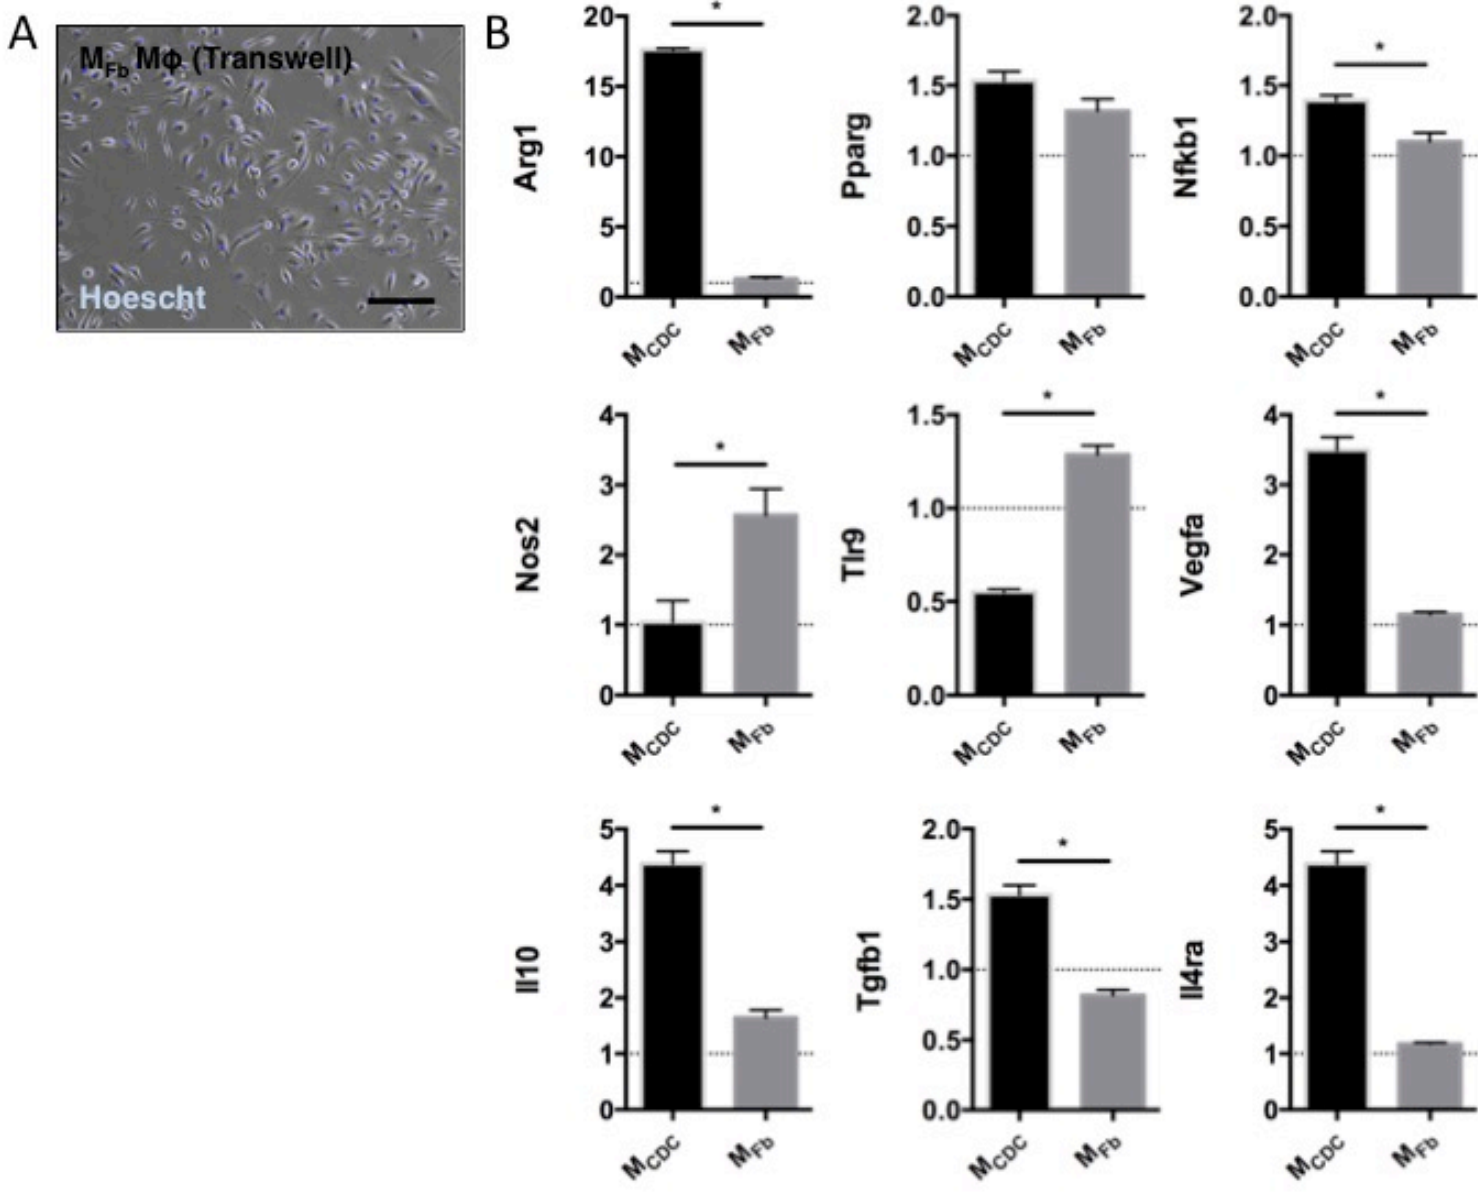

## SUPPLEMENTAL DATA

### **Supplemental Figure 1. CDCs reduce fibrosis but do not alter the vessel density following IR.**

(A) Representative picrosirius red stain of infarcted hearts 2 weeks following IR injury. Scale bar: 2mm (B) Quantification of fibrosis within the ischemic heart (average value of apex, mid, and base; n=4-5 rats/group). (C) Representative immunohistochemical staining of CD31<sup>+</sup> vessels within the border zone 48hrs following IR injury. Scale bar: 50μm (D) Quantification of vessel density (n=5-6 rats/group). Graphs depict mean ± SEM. Statistical significance was determined using Student's T-test. \*p<0.05

### **Supplemental Figure 2. CDC polarization of thioglycollate-elicited peritoneal Mφ (pMφ).**

(A) Schematic depicting the duration of transwell coculture prior to gene expression analysis of isolated pMφ and subsequent co-culture with NRVMs. (B) Representative flow plot depicting the purity of CD68<sup>+</sup> pMφ following peritoneal lavage. (C) Pooled changes in gene expression of M1 and M2 markers observed in pMφ cocultured in transwell with CDC after 6 or 24 hours (relative to PBS control). NRVMs were then treated with H<sub>2</sub>O<sub>2</sub> (50μM), prior to transwell coculture with pMφ. After 6 hours, NRVMs were collected for protein and gene expression analyses (n = 3 rats/group). (D) Immunoblots depicting the reduction in stress (pJNK, pp65) and apoptosis (caspase 3) marker expression in CDC-primed Mφ (n = 3 rats/group). (E) Pooled changes in protein expression of immunoblots in (D). (F) Changes in cardiomyocyte stress-associated gene expression of CDC-primed versus PBS-primed pMφ (pooled n=3/group). Graphs depict mean ± SEM. Statistical significance was determined using 1-way ANOVA followed by Tukey's multiple comparisons test. \*p<0.05

### **Supplemental Figure 3. Co-culture of CDCs, but not fibroblasts, with BM-derived Mφ elicit a distinct gene expression profile.**

(A) Representative phase contrast image of BM-derived Mφ following co-culture with fibroblasts (M<sub>Fb</sub>). Scale bar: 100μm (B) Gene expression profiles of Mφ polarized toward M<sub>Fb</sub> and M<sub>CDC</sub> (n = 3/group). Graphs depict mean ± SEM. Statistical significance was determined using 1-way ANOVA followed by Tukey's multiple comparisons test. \*p<0.05.

**Supplemental Table 1. Echocardiographic measurements 2 weeks following IR.**

|                                           | Baseline     |             | 2 weeks                  |                          |
|-------------------------------------------|--------------|-------------|--------------------------|--------------------------|
|                                           | PBS          | CDC         | PBS                      | CDC                      |
| <b>Sample number (n)</b>                  | 4            | 4           | 7                        | 8                        |
| <b>Ejection Fraction (EF; %)</b>          | 69.7 ± 1.3   | 68.9 ± 1.8  | 49.3 ± 6.1 <sup>A</sup>  | 63.5 ± 5.1 <sup>AB</sup> |
| <b>Fractional Area of Change (FAC; %)</b> | 47.4 ± 2.9   | 46.7 ± 1.6  | 30.23 ± 5.1 <sup>A</sup> | 42.8 ± 4.0 <sup>AB</sup> |
| <b>End Systolic Volume (ESV; µL)</b>      | 35.8 ± 8.4   | 42.3 ± 4.2  | 67.5 ± 10.2 <sup>A</sup> | 50.0 ± 19.9 <sup>A</sup> |
| <b>End Diastolic Volume (EDV; µL)</b>     | 119.2 ± 23.8 | 136.1 ± 7.6 | 132.5 ± 17.2             | 138.2 ± 49.8             |

<sup>A</sup> p<0.05 versus equivalent baseline control; <sup>B</sup> p<0.05 versus PBS 2 week treatment. Statistical significance was determined using 2-way ANOVA followed by Sidak's multiple comparisons test.

**Supplemental Table 2. Peripherally-Circulating Inflammatory Cells from Blood (48hrs post-AMI).**

|                                                           | <b>CDC</b>                |            |          | <b>PBS</b>                |            |          | <b>p-value</b> |
|-----------------------------------------------------------|---------------------------|------------|----------|---------------------------|------------|----------|----------------|
|                                                           | <b>Mean</b><br><b>(%)</b> | <b>SEM</b> | <b>n</b> | <b>Mean</b><br><b>(%)</b> | <b>SEM</b> | <b>n</b> |                |
| <b>CD45<sup>+</sup>CD68<sup>+</sup></b>                   | 6.84                      | 0.61       | 4        | 6.20                      | 0.49       | 4        | 0.50           |
| <b>CD45<sup>+</sup>CD11b<sup>+</sup></b>                  | 8.98                      | 0.86       | 4        | 10.08                     | 0.38       | 4        | 0.29           |
| <b>CD45<sup>+</sup>Gran<sup>+</sup></b>                   | 5.77                      | 1.24       | 4        | 7.49                      | 1.18       | 4        | 0.35           |
| <b>CD45<sup>+</sup>CD11b<sup>+</sup>CD11c<sup>+</sup></b> | 11.91                     | 0.87       | 4        | 11.26                     | 1.11       | 4        | 0.66           |
| <b>CD45<sup>+</sup>CD3<sup>+</sup>CD4<sup>+</sup></b>     | 26.61                     | 1.56       | 4        | 27.75                     | 3.23       | 4        | 0.76           |
| <b>CD45<sup>+</sup>CD161a<sup>+</sup></b>                 | 0.73                      | 0.17       | 4        | 0.74                      | 0.02       | 4        | 0.96           |
| <b>CD4<sup>+</sup>CD25<sup>+</sup>Foxp3<sup>+</sup></b>   | 1.21                      | 0.18       | 4        | 1.20                      | 0.13       | 4        | 0.97           |

**Supplemental Table 3. Infiltrating Inflammatory Cells within the Ischemic Myocardium (48hrs post-AMI)**

|                                                           | CDC      |      |   | PBS      |      |   | p-value |
|-----------------------------------------------------------|----------|------|---|----------|------|---|---------|
|                                                           | Mean (%) | SEM  | N | Mean (%) | SEM  | n |         |
| <b>CD45<sup>+</sup>CD11b<sup>+</sup></b>                  | 27.53    | 1.29 | 4 | 16.95    | 2.31 | 4 | *<0.01  |
| <b>CD45<sup>+</sup>Gran<sup>+</sup></b>                   | 46.88    | 0.67 | 4 | 47.33    | 1.41 | 4 | 0.78    |
| <b>CD45<sup>+</sup>CD11b<sup>+</sup>CD11c<sup>+</sup></b> | 19.73    | 1.14 | 4 | 16.70    | 0.67 | 4 | *0.05   |
| <b>CD45<sup>+</sup>CD3<sup>+</sup>CD4<sup>+</sup></b>     | 7.74     | 0.90 | 4 | 8.34     | 0.81 | 4 | 0.64    |
| <b>CD45<sup>+</sup>CD3<sup>+</sup>CD8<sup>+</sup></b>     | 7.30     | 0.92 | 4 | 7.35     | 1.36 | 4 | 0.98    |

**Supplemental Table 4. Antibodies used for flow cytometry.**

| <b>Antibody</b> | <b>Fluorophore</b> | <b>Clone</b> | <b>Catalog No.</b> | <b>Supplier</b> |
|-----------------|--------------------|--------------|--------------------|-----------------|
| CD45            | FITC               | OX-1         | 554877             | BD Biosciences  |
| CD45            | PE-Cy7             | OX-1         | 561588             | BD Biosciences  |
| CD11b           | APC                | WT.5         | 562102             | BD Biosciences  |
| CD11c           | FITC               | 8A2          | MCA1441F           | AbD Serotec     |
| CD3             | APC                | 1F4          | 557030             | BD Biosciences  |
| CD4             | FITC               | OX-35        | 554837             | BD Biosciences  |
| CD8a            | PE                 | OX-8         | 554857             | BD Biosciences  |
| CD68            | PE                 | ED1          | MCA341PE           | AbD Serotec     |
| Granulocyte     | FITC               | HIS48        | 554907             | BD Biosciences  |
| CD161a          | PE                 | 10/78        | 555009             | BD Biosciences  |
| CD80            | PE                 | 3H5          | 555014             | BD Biosciences  |
| CD86            | FITC               | 24F          | 555018             | BD Biosciences  |
